# Supplementary material for: Multiple Approaches Detect the Presence of Fungi in Human Breastmilk Samples from Healthy Mothers
Source: PubMed Central journal article supplement (PMC5638952; doi:10.1038/s41598-017-13270-x), 2017-10-12
Supplement: 41598_2017_13270_MOESM1_ESM.pdf [file 41598_2017_13270_MOESM1_ESM.pdf]

## Multiple approaches detect the presence of fungi in human breast milk samples from healthy mothers.

Alba Boix-Amorós, Cecilia Martinez-Costa, Amparo Querol, Maria Carmen Collado\*, Alex Mira\*.

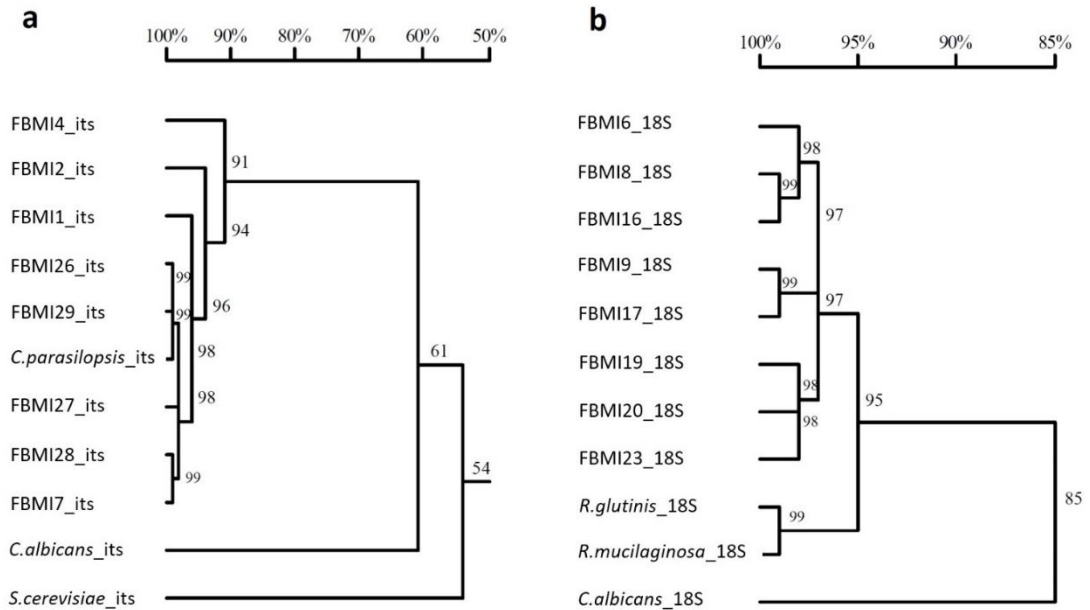

**Supplementary Figure 1. Homology trees for *C.parapsilosis* and *R.mucilaginosa* isolates from breast milk.** (a) Shows a homology tree for *Candida parapsilosis* isolates from breast milk samples (n=8) PCR-amplified with ITS1-5.8 primers and Sanger-sequenced. Three reference strains were included as controls (*C.parapsilosis*, *C.albicans* and *S.cerevisiae*). (b) Shows a homology tree for *Rhodotorula mucilaginosa* isolates from breast milk samples (n=8) PCR-amplified with 18S rRNA primers and Sanger-sequenced. Three reference strains were included as controls (*R.mucilaginosa*, *R.glutinis* and *C.albicans*). Multiple alignments and homology trees were performed with DNAMAN software.

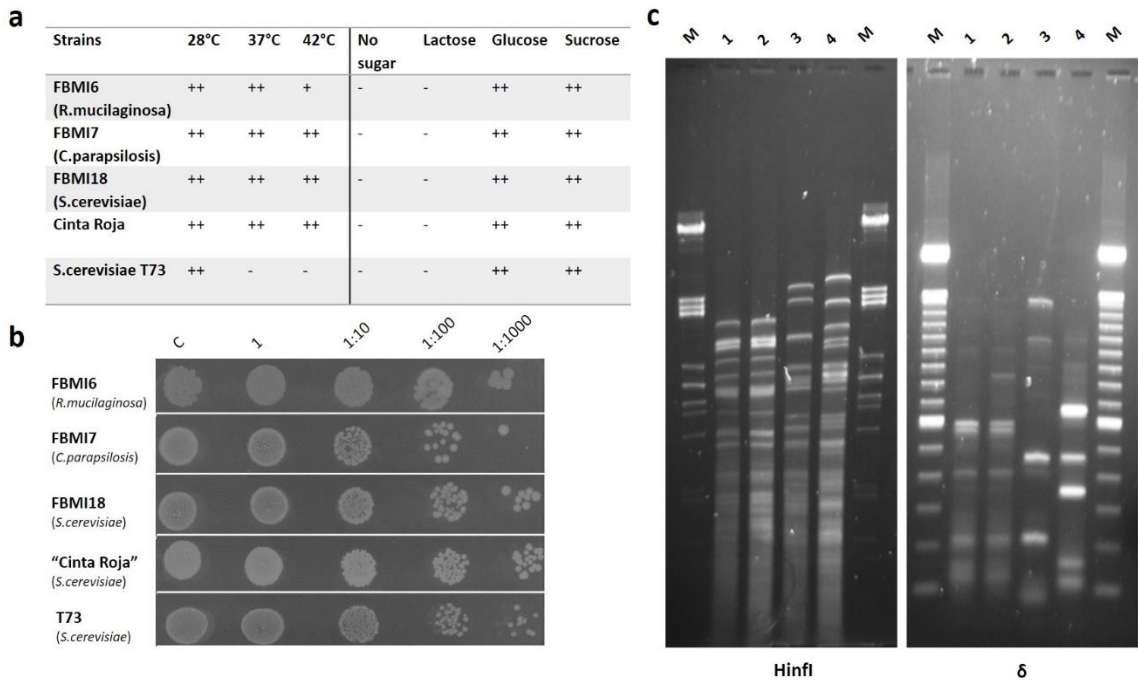

**Supplementary Figure 2. Phenotypic and genetic characterization of fungal isolates from human breastmilk. a) Isolates viability at different temperatures and utilization of different sugars.** (-) indicates no growth, (+) indicates moderate growth, and (++) indicates high growth. **b) Isolates' resistance to oxidative stress.** The picture shows the differential growth of isolates after 1-hour exposure to 6mM H<sub>2</sub>O<sub>2</sub>. The first column corresponds to the growth of isolates without H<sub>2</sub>O<sub>2</sub> exposure. The remaining columns of growth correspond to isolates exposed to H<sub>2</sub>O<sub>2</sub>: 1(no dilution), and dilutions 1:10, 1:100 and 1:1000. **c) Hinf I mtDNA restriction patterns (HinfI) and  $\delta$ -PCR amplification patterns ( $\delta$ ) of the DNA of yeast strains.** 1 (FBMI18 strain), 2 (Baker's yeast "Cinta roja"), 3 (Wine strain T73), 4 (*S.boulardii*, Ultralevura). The DNA of phage  $\lambda$  digested with Pst I (Roche Molecular Biochemicals) and a 100-bp DNA ladder marker (Gibco BRL, Gaithersburg, MD.) served as the size standard respectively (M).
